# Supplementary material
Source: Springer Nature journal article supplement (https://www.springermedizin.de/resource/supplementary/12943_2010_866_MOESM3_ESM.PDF/9551882)
Supplement: MOESM3 [file 9551882]

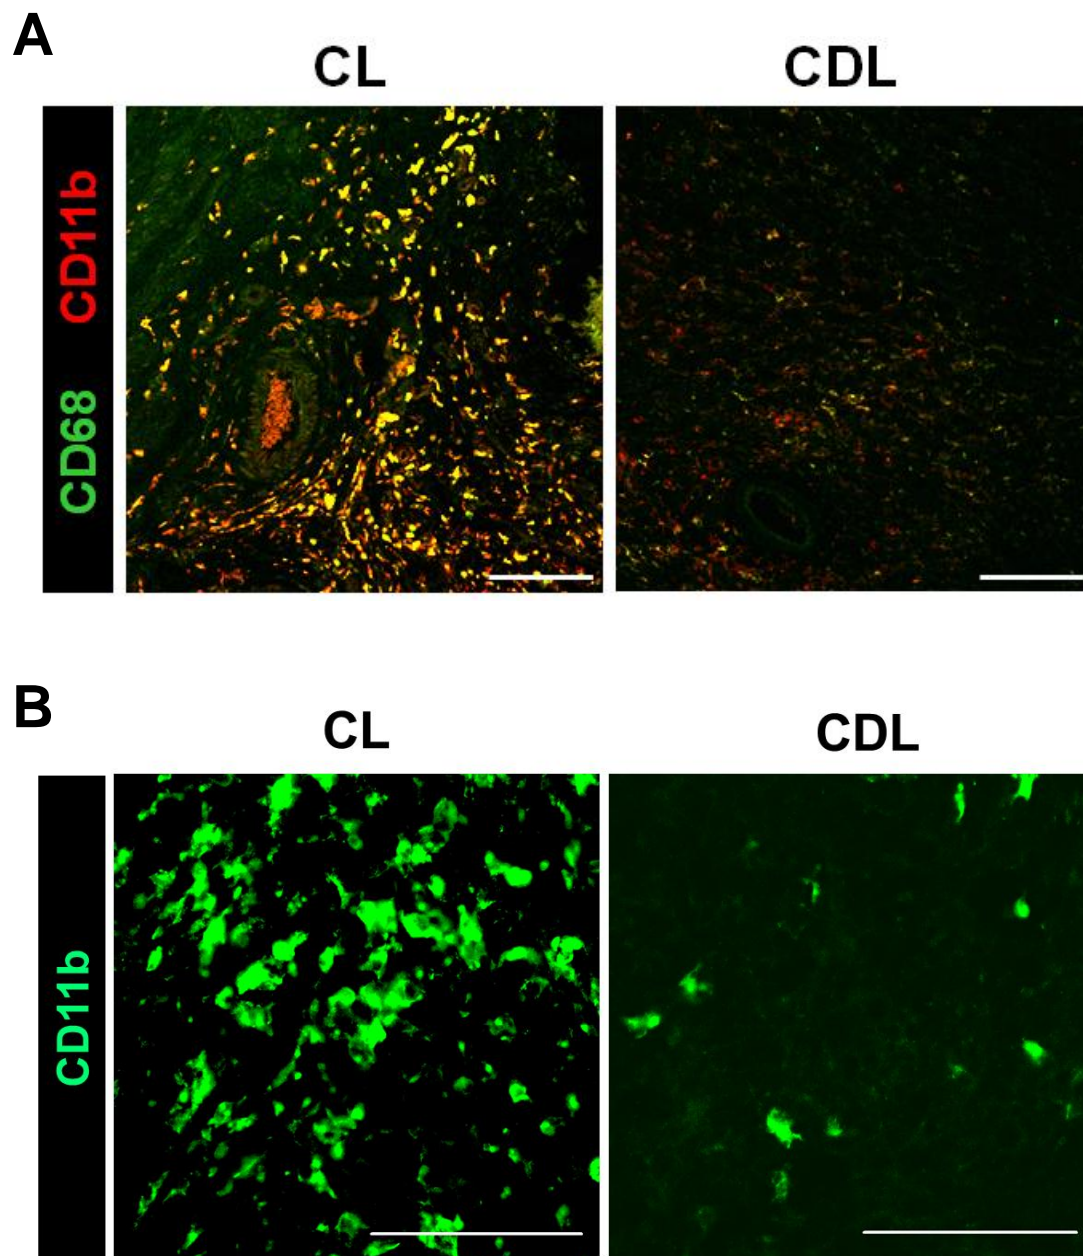

### Additional Figure 3. Depletion of TAM by CDL in OUBC

1x10<sup>6</sup> of MBT-2 cells were injected into the urinary bladder of 8-10 week old female C3H mice. 2 weeks after tumor cell injection, CDL or CL was intraperitoneally injected to the mice bearing OUBC at every 3 day. 4 weeks after tumor cell injection, the bladders were harvested and immunostained. (A) Images showing CD11b<sup>+</sup>/CD68<sup>+</sup> TAM in the CL or CDL treated mice. Scale bars, 100  $\mu$ m. (B) High magnification view showing the depletion of CD11b<sup>+</sup> TAM in CDL treated mice compared to CL treated mice. Scale bars, 100  $\mu$ m.
